# Supplementary material for: Three new species of western California springsnails previously confused with Pyrgulopsis stearnsiana (Caenogastropoda, Hydrobiidae)
Source: Zookeys. 2016 Jun 29;(601):1–19. doi: 10.3897/zookeys.601.9040 (PMC4978076; doi:10.3897/zookeys.601.9040)
Supplement: Supplementary material 1 — Specimen codes, number of sequenced specimens, locality details, and GenBank accession numbers [file zookeys-601-001-s001.xlsx]

## Sheet: Sheet1
Appendix 1
Specimen codes, number of sequenced specimens, locality details, and GenBank accession numbers.
Species	Code	#	Locality	COI	NDI
P. stearnsiana
San Francisco Bay area
	Pst1	4	Spring run, Glen Canyon Park, San Francisco Co., CA	KX398371	KX398397
	Pst2	3	Seep under the connector between Hwy 280 and Hwy 101, San Francisco Co., CA	KX398372	KX398398 KX398399
	Pst3	6	Spring north of Laguna Honda, San Francisco Co., CA	KX398373 KX398374	KX398400 KX398401 KX398402
	Pst4	4	Lobos Creek, San Francisco Co., CA	KX398375	KX398403
	Pst5	4	Spring along trail northeast of Ft. Miley, San Francisco Co., CA	KX398376	KX398404
	Pst6	4	Spring north of Geary Road, east of Calaveras Reservoir, Alameda Co., CA	KX398377	KX398405
	Pst7	4	Spring north of Geary Road, north of Calaveras Reservoir, Alameda Co., CA	KX398378 KX398379	KX398406 KX398407
	Pst8	4	Spring south of Geary Road, northeast of Calaveras Reservoir, Alameda Co., CA	KX398380 KX398381	KX398408 KX398409
	Pst9	6	Spring along Weller Road, west of Calaveras Reservoir, Santa Clara Co., CA	KX398382	KX398410
	Pst10	5	Temescal Creek, Alameda Co., CA	KX398383 KX398384	KX398411 KX398412
	Pst11	4	Spring tributary to northeast corner of Rodeo Lagoon, Marin Co., CA	KX398385	KX398413
	Pst17	4	Stream at Hilarita, Marin Co., CA	KX398395	KX398424
	Pst18	4	Seep south of Stinson Beach, Marin Co., CA	KX398396	KX398425 KX398426 KX398427
	WCC		Springs in Wildcat Canyon, Contra Costa Co., CA	AF520925	AY367551
Central and southern coastal drainages
	Pst12	4	McWay Creek, Monterey Co., CA	KX398386 KX398387	KX398414 KX398415
	Pst13	4	Spring at Seven Stairs, Monterey Co., CA	KX398388 KX398389	KX398416
	Pst14	4	Stream south of Salmon Creek, Monterey Co., CA	KX398390	KX398417 KX398418 KX398419
	Pst15	4	Springs southeast of Leffengwell Creek, San Luis Obispo Co., CA	KX398391 KX398392	KX398420
	Pst16	4	San Miguelito Creek, Santa Barbara Co., CA	KX398393 KX398394	KX398421 KX398422 KX398423
	P26		Partington Creek, Monterey Co., CA	GQ275092	n. d.
	PC			AY367489	AY367552
	CC		Stream in Colson Canyon, Santa Barbara Co., CA	AY367490	AY367553
P. lindae			San Domingo Creek, Calaveras Co., CA	GQ275091	n. d.
P. ojaiensis			Spring tributary to Sisar Creek, Ventura Co., CA	GQ275093	n. d.
P. torrida			Stream, Little Sycamore Canyon, Ventura Co., CA	GQ275094	n. d.
Outgroups
P. castaicensis			Middle Canyon Spring, California Coastal drainage, Los Angeles Co., CA	GQ275097	n. d.
P. diablensis			Stream, Del Puerto Canyon, San Joaquin River basin, Stanislaus Co., CA	AY627922	AY628044
P. giulianii	DC		Dougherty Creek, Hwy 178 crossing, Kern River basin, Kern Co., CA	DQ364018	DQ364039
	SC		Stream, Sand Canyon, Indian Wells Valley, Kern Co., CA	AF520937	AY367545
P. greggi			Grapevine Creek, Kern River basin, Kern Co., CA	GQ275088	AY367546
P. licina			Spring south of Rogers Spring, Ash Meadows, Nye Co., NV	KF559190	AY367536
P. milleri			Pierpoint Spring, Tulare-Buena Vista Lakes drainage, Tulare Co., CA	GQ275096	KF559203
P. owensensis			Stream in canyon south of Piute Canyon, Owens Valley, Mono Co., CA	GQ275089	AY367549
P. perforata			Spring east of Scotty’s Castle, Death Valley, Inyo Co., CA	AY367433	AY367498
P. sanchezi			Spring north of Tecopa Hot Springs, Amargosa River basin, Inyo Co., CA	AY367469	AY367529
P. taylori			Spring tributary to San Luis Obispo Creek, California coastal drainage, San Luis Obispo Co., CA	AY627923	AY628045
P. turbatrix			Springs at Big Bear Ranger Station, Santa Ana River basin, San Bernardino Co., CA	AY367462	AY367524
M. lustrica			Stockbridge Bowl, Connecticut Coastal drainage, Berkshire Co. ME	AF520945	KX398424
*** Newly obtained sequence
n. d. No data
